# Supplementary material for: Natural Selection Towards Wild-Type in Composite Cross Populations of Winter Wheat
Source: PubMed Central journal article supplement (PMC7053226; doi:10.3389/fpls.2019.01757), 2020-02-25
Supplement: Presentation_1.pdf [file Presentation_1.pdf]

## Supporting Information

### Supporting Methods

#### M2: Estimation of $N_e$ with the 'temporal method'

As a second method to estimate  $N_e$ , we used the 'temporal method' as first developed by Waples (1989), which is based on the allele frequencies in two generations. We first calculated the standardized variance of gene frequency change,  $\widehat{F}_c$ , for each locus, assuming sampling before reproduction (eq. 8 in Waples (1989)):

$$\widehat{F}_c = \frac{1}{K} \sum_{i=1}^K \frac{(x_i - y_i)^2}{(x_i - y_i)/2 - x_i y_i},$$

where  $K$  is the number of alleles,  $x_i$  and  $y_i$  are the frequencies of the  $i$ -th allele in the two different generations. As all loci had two alleles (see Material and Methods in the main section) the genomewide-estimate ( $\overline{F}_c$ ) was calculated as the mean over all per loci estimates. The number of sampled individuals was calculated as harmonic mean over loci (Nei and Tajima, 1981) and  $N_e$  was calculated as

$$N_e = \frac{t}{2[\overline{F}_c - \frac{1}{2S_1} - \frac{1}{2S_2}]},$$

where  $t$  is the number of generations, and  $S_1$  and  $S_2$  are the numbers of sampled individuals in the first and in the second generation, respectively. 95% confidence intervals (CI) for the estimates of  $N_e$  were derived, assuming that  $\frac{n\overline{F}_c}{E(\overline{F}_c)}$  is  $\chi^2$ -distributed with  $n$  degrees of freedom and  $n$  being the numbers of loci (Lewontin and Krakauer, 1973)

$$95\% \text{ CI } (\overline{F}_c) = \left\{ \frac{n\overline{F}_c}{\chi^2(0.025, n)}; \frac{n\overline{F}_c}{\chi^2(0.975, n)} \right\}$$

and subsequent calculation the 95% CIs of  $N_e$ .

*Supporting Tables*

Table S 1: Chromosome, number of alleles scored in the parental genotypes and parental genotypes carrying the most frequent alleles. A one indicates that this parental genotype carries the most frequent allele for the given locus.

| Locus         | Marker set | Chromosome | Number of alleles | Bezostaya | Buchan | Cadenza | Claire | Deben | Hereward | HTL | Mercia | Monopol | MWidgeon | Norman | Option | Pastiche | Renan | Renesansa | Soissons | Spark | Tanker | Thatcher | Wembley |
|---------------|------------|------------|-------------------|-----------|--------|---------|--------|-------|----------|-----|--------|---------|----------|--------|--------|----------|-------|-----------|----------|-------|--------|----------|---------|
| B1R_1B        | SNP        | 1B         | 2                 | 1         | 0      | 1       | 1      | 1     | 1        | 0   | 1      | 1       | 1        | 1      | 1      | 1        | 1     | 1         | 1        | 1     | 0      | 1        | 1       |
| Ppd-A1Cdex_2A | SNP        | 2A         | 2                 | 1         | 1      | 1       | 1      | 1     | 1        | 1   | 1      | 1       | 0        | 1      | 1      | 1        | 1     | 1         | 1        | 0     | 1      | 1        | 1       |
| Ppd-B1L5_2B   | SNP        | 2B         | 2                 | 0         | 1      | 1       | 1      | 1     | 1        | 1   | 1      | 1       | 1        | 1      | 1      | 1        | 0     | 1         | 0        | 1     | 1      | 0        | 0       |
| Ppd-D1_2D     | SNP        | 2D         | 2                 | 0         | 1      | 1       | 1      | 1     | 1        | 1   | 1      | 1       | 1        | 1      | 1      | 1        | 1     | 0         | 0        | 1     | 1      | 1        | 1       |
| Ppd-D1D2_2D   | SNP        | 2D         | 2                 | 1         | 1      | 1       | 1      | 0     | 1        | 1   | 1      | 1       | 1        | 0      | 1      | 0        | 1     | 1         | 1        | 1     | 1      | 1        | 1       |
| Rht-B1_4B     | SNP        | 4B         | 2                 | 1         | 1      | 1       | 1      | 1     | 1        | 1   | 1      | 1       | 1        | 1      | 1      | 1        | 0     | 1         | 0        | 1     | 1      | 1        | 1       |
| Rht-D1_4D     | SNP        | 4D         | 2                 | 1         | 0      | 1       | 0      | 0     | 0        | 1   | 1      | 1       | 1        | 0      | 0      | 0        | 1     | 1         | 1        | 1     | 0      | 1        | 0       |
| VrnA1prom_5A  | SNP        | 5A         | 2                 | 1         | 1      | 0       | 1      | 1     | 1        | 1   | 1      | 1       | 1        | 1      | 1      | 1        | 1     | 1         | 1        | 1     | 1      | 0        | 0       |
| barc134_6B    | SSR        | 6B         | 7                 | 0         | 1      | 0       | 0      | 1     | 1        | 0   | 0      | 0       | 0        | 1      | 1      | 0        | 0     | 0         | 0        | 0     | 1      | 0        | 1       |
| gwm165_4B     | SSR        | 4B         | 4                 | 0         | 1      | 1       | 0      | 1     | 1        | 1   | 1      | 0       | 1        | 1      | 0      | 1        | 0     | 0         | 0        | 1     | 1      | 1        | 1       |
| gwm165_4D     | SSR        | 4D         | 4                 | 1         | 1      | 0       | 0      | 1     | 0        | 0   | 1      | 0       | 0        | 1      | 1      | 1        | 0     | 1         | 0        | 0     | 0      | 0        | 1       |
| gwm186_5A     | SSR        | 5A         | 5                 | 0         | 1      | 0       | 1      | 1     | 1        | 0   | 0      | 1       | 1        | 0      | 1      | 0        | 0     | 0         | 1        | 0     | 0      | 0        | 0       |
| gwm190_5D     | SSR        | 5D         | 4                 | 1         | 0      | 1       | 0      | 0     | 1        | 0   | 0      | 0       | 1        | 0      | 0      | 0        | 1     | 1         | 1        | 1     | 0      | 0        | 0       |
| gwm213_5B     | SSR        | 5B         | 6                 | 0         | 1      | 0       | 1      | 1     | 1        | 1   | 1      | 0       | 1        | 1      | 0      | 1        | 0     | 0         | 0        | 0     | 0      | 1        | 0       |
| gwm234_5B     | SSR        | 5B         | 5                 | 0         | 1      | 0       | 1      | 1     | 0        | 1   | 1      | 0       | 0        | 0      | 1      | 1        | 0     | 0         | 0        | 0     | 0      | 0        | 0       |
| gwm325_6D     | SSR        | 6D         | 4                 | 1         | 1      | 0       | 1      | 1     | 1        | 1   | 1      | 1       | 0        | 1      | 0      | 1        | 1     | 0         | 0        | 1     | 0      | 0        | 1       |
| gwm337_1D     | SSR        | 1D         | 5                 | 0         | 0      | 1       | 0      | 1     | 0        | 1   | 1      | 0       | 1        | 1      | 0      | 1        | 1     | 0         | 0        | 0     | 0      | 0        | 0       |
| gwm44_4A      | SSR        | 4A         | 2                 | 1         | 1      | 1       | 0      | 0     | 1        | 1   | 1      | 1       | 1        | 1      | 1      | 1        | 1     | 1         | 1        | 1     | 1      | 1        | 1       |
| gwm44_7D      | SSR        | 7D         | 4                 | 0         | 1      | 1       | 0      | 0     | 1        | 0   | 0      | 1       | 1        | 1      | 0      | 1        | 1     | 0         | 1        | 1     | 1      | 0        | 1       |
| gwm46_7B      | SSR        | 7B         | 4                 | 0         | 1      | 1       | 1      | 1     | 0        | 1   | 1      | 0       | 1        | 1      | 0      | 0        | 0     | 1         | 0        | 1     | 1      | 1        | 0       |
| gwm469_6D     | SSR        | 6D         | 5                 | 0         | 1      | 1       | 0      | 1     | 1        | 1   | 0      | 1       | 0        | 0      | 1      | 0        | 0     | 0         | 0        | 1     | 0      | 1        | 1       |
| gwm539_2D     | SSR        | 2D         | 5                 | 0         | 0      | 0       | 1      | 1     | 0        | 0   | 1      | 0       | 0        | 1      | 0      | 0        | 0     | 0         | 1        | 0     | 1      | 1        | 1       |
| gwm583_5D     | SSR        | 5D         | 4                 | 1         | 0      | 0       | 0      | 0     | 1        | 1   | 1      | 1       | 0        | 0      | 1      | 0        | 1     | 0         | 0        | 1     | 0      | 0        | 0       |
| gwm610_4A     | SSR        | 4A         | 2                 | 1         | 1      | 1       | 1      | 1     | 1        | 1   | 1      | 1       | 1        | 1      | 1      | 1        | 1     | 1         | 0        | 1     | 1      | 0        | 0       |
| gwm626_6B     | SSR        | 6B         | 2                 | 0         | 1      | 1       | 1      | 1     | 1        | 1   | 1      | 1       | 1        | 1      | 1      | 0        | 0     | 0         | 0        | 1     | 1      | 0        | 0       |
| psp3100_1B    | SSR        | 1B         | 7                 | 0         | 0      | 0       | 1      | 1     | 0        | 0   | 0      | 0       | 1        | 1      | 0      | 1        | 0     | 0         | 0        | 0     | 0      | 0        | 0       |
| psp3103A_4D   | SSR        | 4D         | 7                 | 0         | 0      | 0       | 0      | 1     | 1        | 0   | 0      | 0       | 0        | 1      | 1      | 1        | 0     | 0         | 0        | 0     | 0      | 0        | 0       |
| wmc56_3B      | SSR        | 3B         | 5                 | 0         | 1      | 0       | 1      | 1     | 0        | 1   | 0      | 0       | 0        | 1      | 1      | 0        | 1     | 0         | 0        | 0     | 0      | 0        | 0       |

Table S 2: Estimates of effective population size based on the temporal method as described in supporting methods (M1).

| <b>Marker set</b> | <b>Paired generations</b><br><b>Site</b> | <b>FND vs generation 6</b> |            |            | <b>FND vs generation 10</b> |            |            | <b>Generation 6 vs 10</b> |            |
|-------------------|------------------------------------------|----------------------------|------------|------------|-----------------------------|------------|------------|---------------------------|------------|
|                   |                                          | <b>SOF</b>                 | <b>WAF</b> | <b>MET</b> | <b>MOR</b>                  | <b>SOF</b> | <b>WAF</b> | <b>SOF</b>                | <b>WAF</b> |
| SSR               | Ne                                       | 210                        | 128        | 156        | 165                         | 146        | 88         | 144                       | 74         |
|                   | 95% CI                                   | [94-393]                   | [58-237]   | [73-280]   | [77-293]                    | [68-259]   | [41-154]   | [62-288]                  | [33-139]   |
| SNP               | Ne                                       | 78                         | 47         | 56         | 40                          | 43         | 29         | 57                        | 56         |
|                   | 95% CI                                   | [25-226]                   | [15-135]   | [17-141]   | [12-99]                     | [13-109]   | [9-73]     | [15-137]                  | [14-137]   |

Table S 3. F-Test of the marker main effect in single plants in mixed stand.

| Locus              | Plant height | Tillers per plant | Grain number per tiller | Thousand grain weight | Grain weight per tiller | Harvest index | Heading date |
|--------------------|--------------|-------------------|-------------------------|-----------------------|-------------------------|---------------|--------------|
| <b>PpdA1</b>       | 19.5***      | 0                 | 1.4                     | 0.9                   | 0.7                     | 5.4*          | 24.7***      |
| <b>PpdB1</b>       | 0            | 0.2               | 0.1                     | 1.5                   | 0.6                     | 0.1           | 4.6          |
| <b>PpdD1</b>       | 4            | 3.3               | 0                       | 3.1                   | 0.3                     | 0.7           | 3.9          |
| <b>PpdD1D2</b>     | 13.0*        | 0.5               | 0                       | 5.1                   | 2.1                     | 0.4           | 3.4          |
| <b>VrnA1</b>       | 6.7          | 0.1               | 0.1                     | 0.1                   | 0.1                     | 0.1           | 0.7          |
| <b>RhtB1</b>       | 8.4          | 0.4               | 1.3                     | 5.7                   | 2.6                     | 0.1           | 1.5          |
| <b>RhtD1</b>       | 29.3*        | 1.6               | 4.5*                    | 0                     | 2.4                     | 9.9           | 0            |
| <b>1B1R</b>        | 0.1          | 0.1               | 2                       | 0                     | 0.7                     | 0.8           | 2.3          |
| <b>barc134-6B</b>  | 5.6          | 0.3               | 0                       | 2.3                   | 0.4                     | 3.7           | 3.5          |
| <b>gwm165-4B</b>   | 1.9          | 1.4               | 0.1                     | 30.6***               | 3                       | 0.8           | 4.1*         |
| <b>gwm165-4D</b>   | 87.0***      | 0.3               | 2.3                     | 2.5                   | 0.1                     | 5.1           | 0.4          |
| <b>gwm186-5A</b>   | 1.2          | 0.1               | 1.6                     | 0.1                   | 1.6                     | 1.1           | 1.2          |
| <b>gwm190-5D</b>   | 1.1          | 0.1               | 0.6                     | 0.1                   | 0.5                     | 0.3           | 1.3          |
| <b>gwm213-5B</b>   | 5.4*         | 5.7               | 2.2                     | 12.8*                 | 0.2                     | 10.9*         | 0            |
| <b>gwm234-5B</b>   | 0.3          | 0.1               | 0.5                     | 0.1                   | 0.2                     | 3.2           | 2            |
| <b>gwm325-6D</b>   | 3.4          | 2.7               | 2.1                     | 0.4                   | 2.5                     | 1.9           | 0.1          |
| <b>gwm337-1D</b>   | 29.3*        | 1.3               | 0                       | 19.1*                 | 1                       | 3.4           | 0.1          |
| <b>gwm44-4A</b>    | 2.5          | 2                 | 4.9*                    | 0                     | 2.6                     | 0             | 1.3          |
| <b>gwm44-7D</b>    | 2.2          | 1.4               | 0.3                     | 5.2                   | 2.6                     | 0.1           | 4.2*         |
| <b>gwm46-7B</b>    | 2.3          | 2.4               | 1.1                     | 10.1                  | 0                       | 0.7           | 1.9          |
| <b>gwm469-6D</b>   | 0.2          | 0                 | 0.3                     | 6.8                   | 2.9                     | 2.3           | 0.1          |
| <b>gwm539-2D</b>   | 40.8***      | 2.5               | 0.7                     | 0                     | 1.4                     | 1.6           | 2.9          |
| <b>gwm583-5D</b>   | 8.8**        | 1.1               | 0.6                     | 16.2*                 | 0.3                     | 0             | 1.5          |
| <b>gwm610-4A</b>   | 0.2          | 0.9               | 0.2                     | 0.2                   | 0.4                     | 0.1           | 1.3          |
| <b>gwm626-6B</b>   | 2.6          | 0.4               | 0.2                     | 2.9                   | 0                       | 0.2           | 23.0***      |
| <b>psp3100-1B</b>  | 1.8          | 0.7               | 0                       | 11.0*                 | 3                       | 0.3           | 2.2          |
| <b>psp3103A-4D</b> | 48.0**       | 0.9               | 0.7                     | 0.2                   | 0.9                     | 3.4           | 0.6          |
| <b>wmc56-3B</b>    | 9.4          | 0.2               | 1.7                     | 4.2                   | 0.2                     | 0.2           | 16.3***      |

\*, \*\*, \*\*\* denotes  $P < 0.05$ ,  $P < 0.01$ , and  $P < 0.001$ , respectively, of the F-Test of marker main effect in the ANOVA

Table S 4. F-Test of the marker main effect in single genotype pure stand.

| Locus              | Plant height | Tillers per plant | Grain number per tiller | Thousand grain weight | Grain weight per tiller | Harvest index | Grain yield |
|--------------------|--------------|-------------------|-------------------------|-----------------------|-------------------------|---------------|-------------|
| <b>PpdA1</b>       | 4.8*         | 0.2               | 1.3                     | 0.1                   | 0.8                     | 3.4           | 0.1         |
| <b>PpdB1</b>       | 1.2          | 1                 | 2.1                     | 0.9                   | 1.1                     | 0.3           | 1.5         |
| <b>PpdD1</b>       | 0.1          | 12.0**            | 0                       | 0.8                   | 0.6                     | 0.5           | 1.2         |
| <b>PpdD1D2</b>     | 0.3          | 0.4               | 0.5                     | 0.2                   | 1.5                     | 0.2           | 1.5         |
| <b>VrnA1</b>       | 2.1          | 0.4               | 0.8                     | 1.3                   | 3.9                     | 1             | 1.7         |
| <b>RhtB1</b>       | 0.2          | 0.2               | 1.6                     | 1                     | 0.6                     | 0.1           | 0.2         |
| <b>RhtD1</b>       | 9.0**        | 3.6               | 15.5**                  | 2.2                   | 6.2*                    | 9.0**         | 8.2*        |
| <b>1B1R</b>        | 1.3          | 2.9               | 0                       | 0                     | 0.1                     | 0.2           | 0.1         |
| <b>barc134-6B</b>  | 5.7*         | 6.3*              | 8.9**                   | 2                     | 3.8                     | 6.7*          | 5.9*        |
| <b>gwm165-4B</b>   | 0.2          | 6.6*              | 0.1                     | 0.9                   | 0.7                     | 0.6           | 0.1         |
| <b>gwm165-4D</b>   | 2.6          | 0                 | 7.8*                    | 0                     | 8.7**                   | 5.0*          | 1.2         |
| <b>gwm186-5A</b>   | 0.2          | 0.1               | 1.3                     | 0.6                   | 0.3                     | 0.1           | 1.8         |
| <b>gwm190-5D</b>   | 0.4          | 3.8               | 2.3                     | 1.2                   | 0.5                     | 0.5           | 1.9         |
| <b>gwm213-5B</b>   | 0.4          | 0.4               | 0.1                     | 0                     | 0.1                     | 0.9           | 0           |
| <b>gwm234-5B</b>   | 2.2          | 3.1               | 2.9                     | 1.3                   | 0.7                     | 1.5           | 5.7*        |
| <b>gwm325-6D</b>   | 0.5          | 0.5               | 0                       | 0                     | 0                       | 0             | 1.1         |
| <b>gwm337-1D</b>   | 0.7          | 0.3               | 1.2                     | 1.8                   | 0.1                     | 1.5           | 0           |
| <b>gwm44-4A</b>    | 0.4          | 1.2               | 2.4                     | 0.7                   | 0.9                     | 1.3           | 4.8*        |
| <b>gwm44-7D</b>    | 0.2          | 0.2               | 0.3                     | 0                     | 0.1                     | 0.2           | 0           |
| <b>gwm46-7B</b>    | 0.3          | 2.2               | 0                       | 0.5                   | 0.3                     | 0.1           | 0.1         |
| <b>gwm469-6D</b>   | 0.4          | 7.8*              | 0.4                     | 3.4                   | 4.8*                    | 1             | 0           |
| <b>gwm539-2D</b>   | 0.3          | 1.4               | 2.5                     | 2.8                   | 0.2                     | 2.6           | 4           |
| <b>gwm583-5D</b>   | 0            | 0.1               | 0.7                     | 0.1                   | 0.6                     | 0.4           | 0           |
| <b>gwm610-4A</b>   | 1.2          | 0                 | 0.6                     | 0.6                   | 2.6                     | 0.1           | 0.2         |
| <b>gwm626-6B</b>   | 0.3          | 5.4*              | 1.2                     | 3.5                   | 0                       | 0             | 2.8         |
| <b>psp3100-1B</b>  | 0.3          | 0                 | 0.5                     | 0.4                   | 1.6                     | 0.1           | 0.5         |
| <b>psp3103A-4D</b> | 1.5          | 0.4               | 2                       | 0.2                   | 1.4                     | 1.1           | 2.3         |
| <b>wmc56_3B</b>    | 0.9          | 4.6*              | 0.1                     | 0                     | 0                       | 0.6           | 2.8         |

\*,\*\*,\*\*\* denotes  $P < 0.05$ ,  $P < 0.01$ , and  $P < 0.001$ , respectively, of the F-Test of marker main effect in the ANOVA

**Supporting Figures**

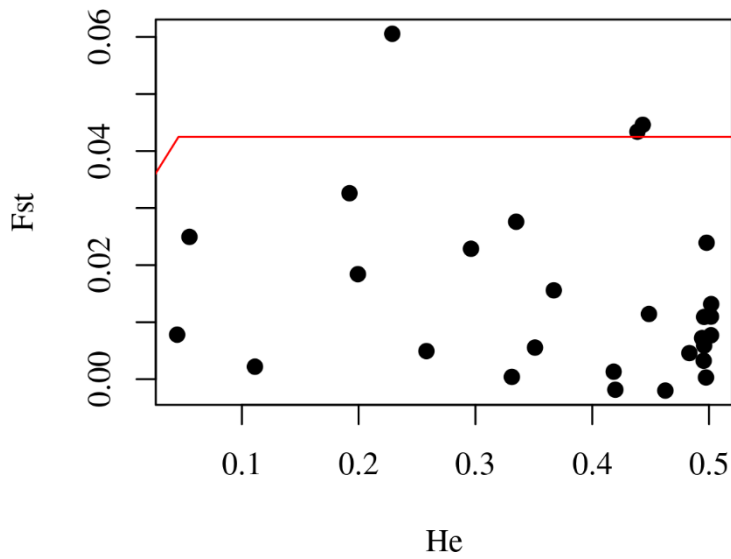

**Fig. S1**  $F_{st}$  values at generation 10 comparing all 4 bread wheat CCP populations plotted against expected heterozygosity ( $H_e$ ). The red line indicates the 95% null distribution quantile from the island model simulation with *Arlequin* based on 20,000 simulations with 100 demes (see Material and methods). The three dots above the red line represent the three loci identified as under selection ( $P < 0.05$ ).

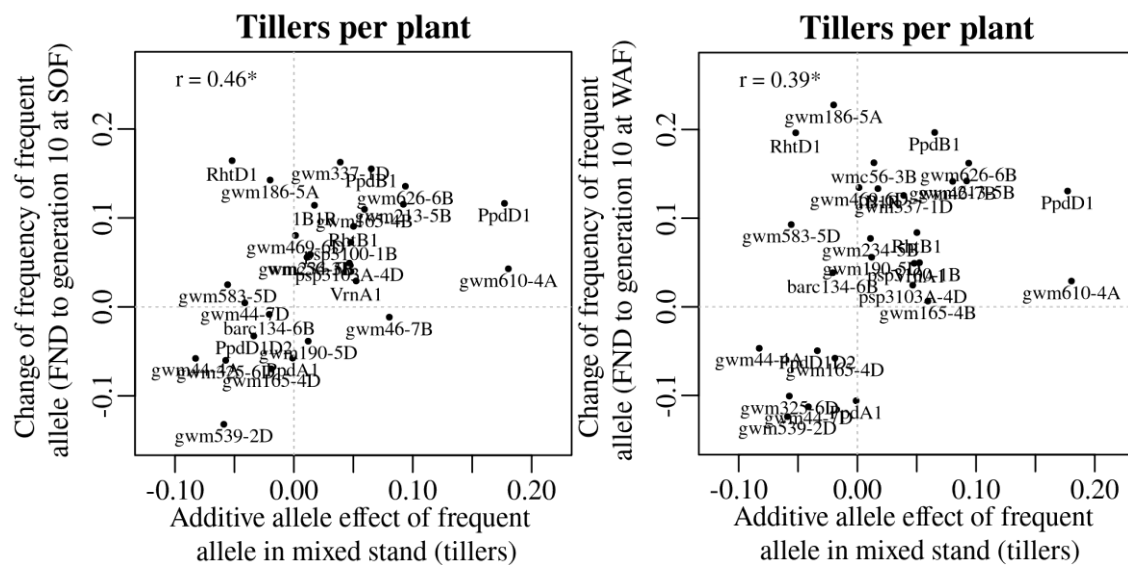

**Fig. S2.** Relation of the additive allele effect on tillers per plant in single plants in mixed stands to the change in allele frequency at SOF (left) and WAF (right).
